# Supplementary material for: Physicochemical Characterization of an Exopolysaccharide Produced by Lipomyces sp. and Investigation of Rheological and Interfacial Behavior
Source: MDPI journal article supplement (doi:10.3390/gels7040156), 2021-09-28
Supplement: s1 [file s1]

Article

# Physicochemical Characterization of an Exopolysaccharide Produced by *Lipomyces* sp. and Investigation of Rheological and Interfacial Behavior

Wentian Li <sup>1</sup>, Yilin Guo <sup>1</sup>, Haiming Chen <sup>1,2,\*</sup>, Wenxue Chen <sup>1</sup>, Hailing Zhang <sup>3</sup>, Ming Zhang <sup>1</sup>, Qiuping Zhong <sup>1</sup> and Weijun Chen <sup>1,4,\*</sup>

## Supplementary Materials:

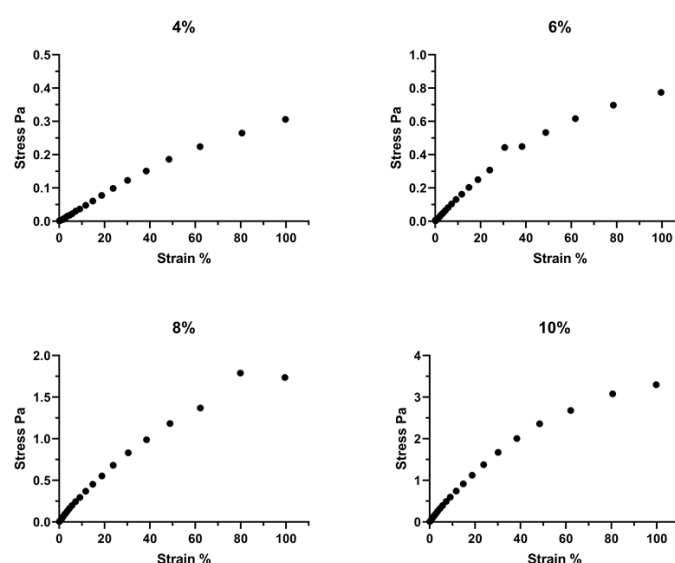

Figure S1. Measurement of linear viscoelastic region.
